# Supplementary material
Source: MDPI journal article supplement (https://www.mdpi.com/2073-4395/11/8/1626)
Supplement: s1 [file s1]

Table S1. The four nitrogen fertilizer levels and UAV flight date during first and second crop in 2019.

| Year | Cultivar | Crop season | Seedling date | Nitrogen fertilizer date | Nitrogen fertilizer level (kg/ha) | Field sampling date | UAV flight date | Growth stage <sup>z</sup> |
|------|----------|-------------|---------------|--------------------------|-----------------------------------|---------------------|-----------------|---------------------------|
| 2019 | TNG71    | I           | 8-Mar         | 6-Mar                    | 80 (N1)                           | 13-Mar              | 14-Mar          | Seedling                  |
|      |          |             |               | 25-Mar                   | 120 (N2)                          | 3-Apr               | 2-Apr           | Tillering I               |
|      |          |             |               | 8-Apr                    | 160 (N3)                          | 17-Apr              | 17-Apr          | Tillering II              |
|      |          |             |               | 8-May                    | 200 (N4)                          | 30-Apr              | 30-Apr          | Max tillering             |
|      |          |             |               |                          |                                   | 15-May              | 10-May          | Booting                   |
|      |          |             |               |                          |                                   | 29-May              | 29-May          | Heading                   |
|      |          |             |               |                          |                                   | 19-Jun              | 13-Jun          | Filling                   |
|      |          | II          | 26-Jul        | 17-Jul                   | 80 (N1)                           | 13-Aug              | 20-Aug          | Initial tillering         |
|      |          |             |               | 14-Aug                   | 120 (N2)                          | 28-Aug              | 28-Aug          | Tillering                 |
|      |          |             |               | 12-Sep                   | 160 (N3)                          | 6-Sep               | 3-Sep           | Max tillering             |
|      |          |             |               |                          | 200 (N4)                          | 23-Sep              | 24-Sep          | Heading                   |
|      |          |             |               |                          |                                   | 7-Oct               | 7-Oct           | Filling I                 |
|      |          |             |               |                          |                                   | 21-Oct              | 21-Oct          | Filling II                |

<sup>z</sup> Tillering I is the initial stage of tillering after the first topdressing; Tillering II is the middle tillering stage after the second topdressing; Filling I is the milk stage during grains fill process; Filling II is the yellow ripe stage during grains fill process.

(a)

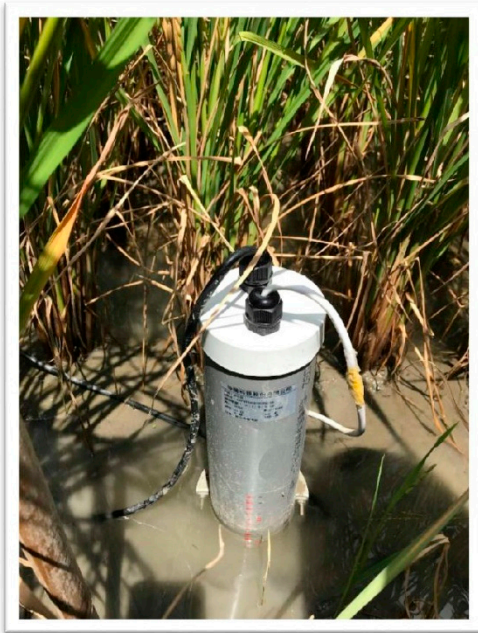

(b)

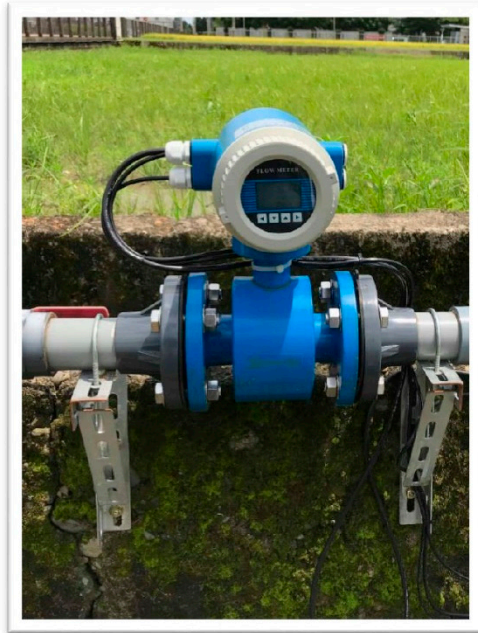

Additional file 1: Figure S1. Intelligent sensor for paddy field. (a) water level sensor  
(b) remote intelligent water meter.

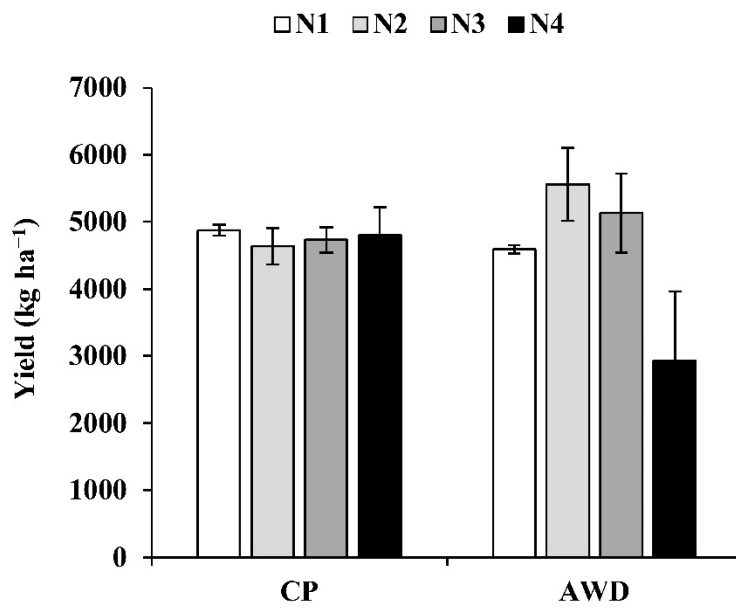

Additional file 2: Figure S2. The yields of the early maturing rice TNG71 in the first crop under different water and fertilizer treatments. The amount of fertilizer of TNG71 were 80 kg/ha (N1), 120 kg/ha (N2), 160 kg/ha (N3), and 200 kg/ha (N4). Conventional plant (CP), alternative wet and dry (AWD).

Additional file 3: Table S1. The four nitrogen fertilizer levels and UAV flight date during first and second crop in 2019.
